# Supplementary material for: Structural and Genomic Evolution of RRNPPA Systems and Their Pheromone Signaling
Source: PubMed Central journal article supplement (PMC9765709; doi:10.1128/mbio.02514-22), 2022-10-19

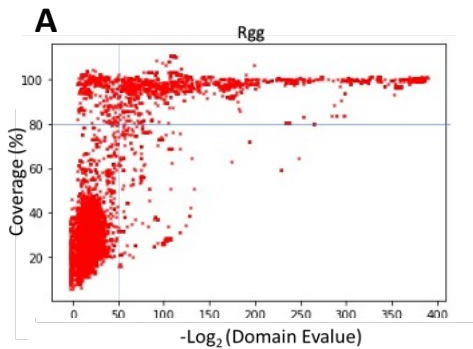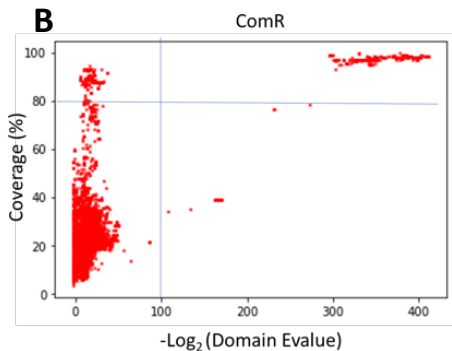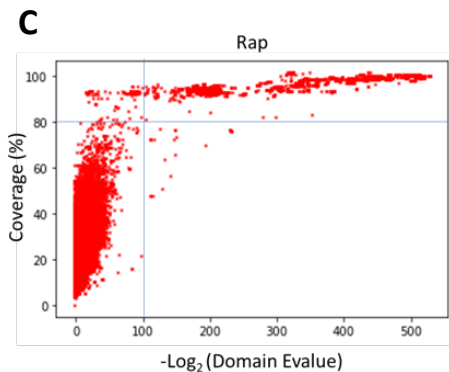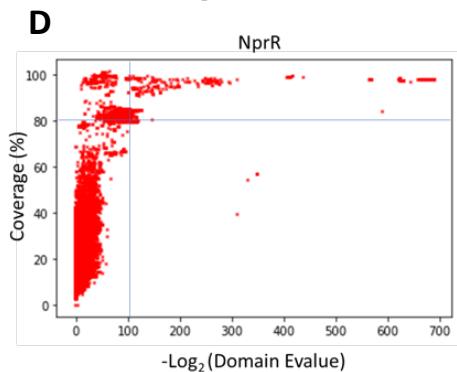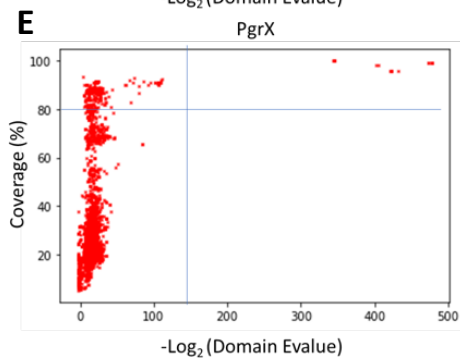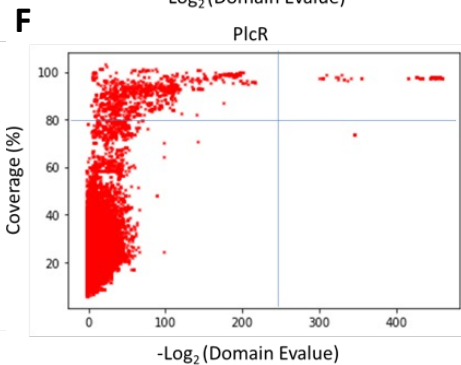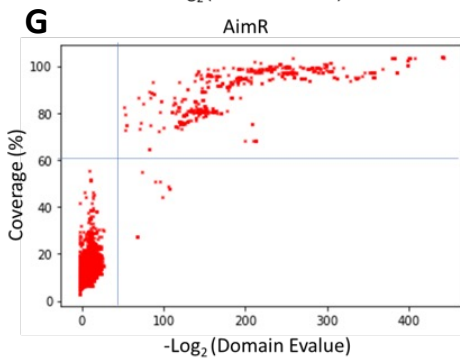

Supplement: mbio.02514-22-s0001.pdf [file mbio.02514-22-s0001.pdf]
