# Supplementary material for: Structural and Genomic Evolution of RRNPPA Systems and Their Pheromone Signaling
Source: PubMed Central journal article supplement (PMC9765709; doi:10.1128/mbio.02514-22), 2022-10-19
Supplement: mbio.02514-22-s0002.pdf [file mbio.02514-22-s0002.pdf]

HTH tree

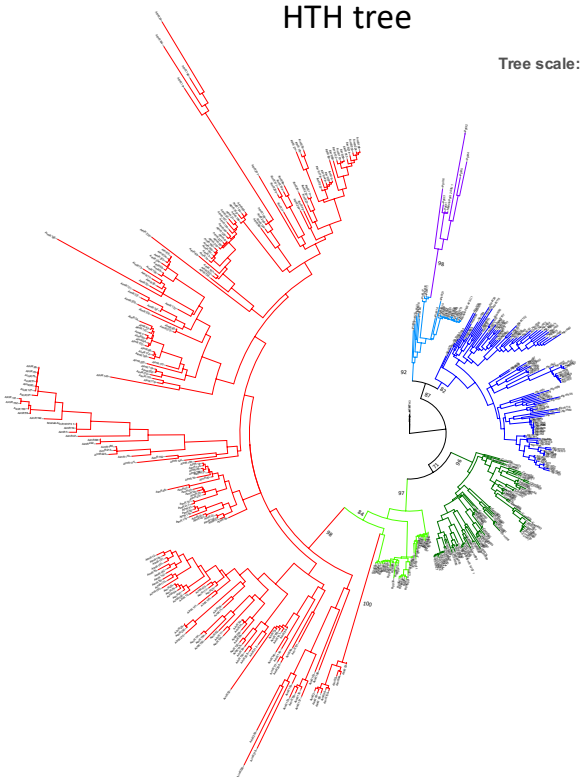

Tree scale: 1

Complete proteins tree

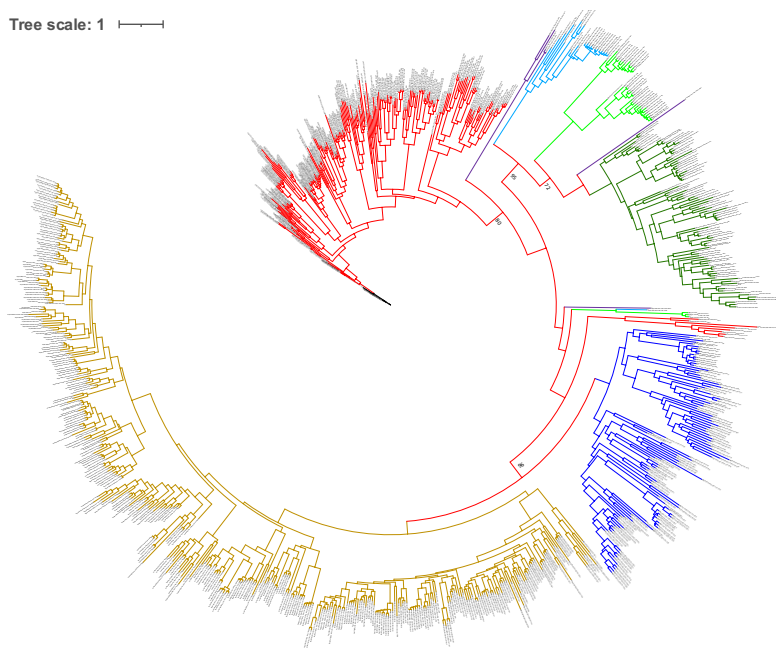

Tree scale: 1

Structurally conserved TPR tree

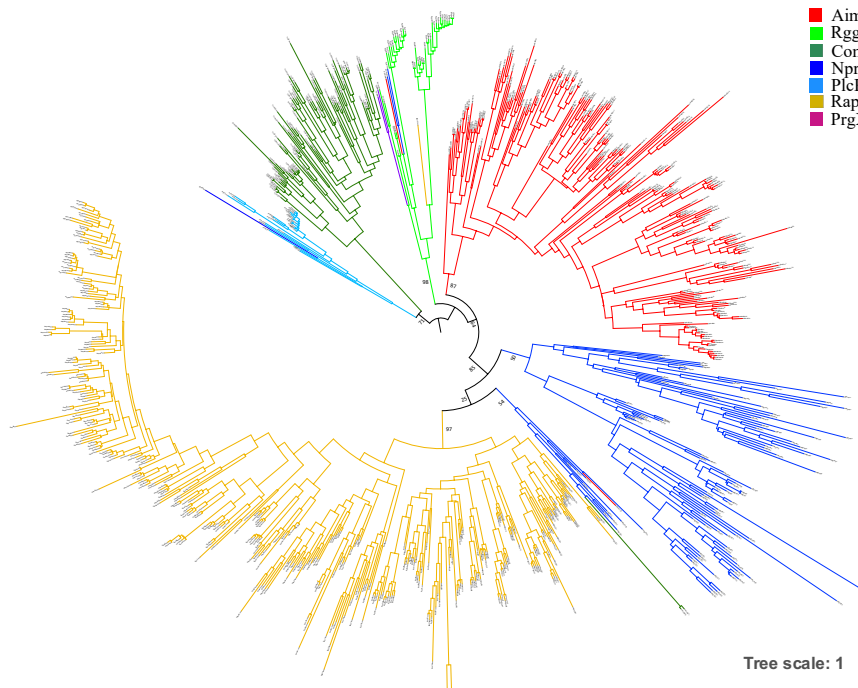

- AimR
- Rgg
- ComR
- NprR
- PlcR
- Rap
- PrgX

Tree scale: 1
